# Supplementary material for: Pure omega 3 polyunsaturated fatty acids (EPA, DPA or DHA) are associated with increased plasma levels of 3-carboxy-4-methyl-5-propyl-2-furanpropanoic acid (CMPF) in a short-term study in women
Source: Royal Society of Chemistry journal article supplement (doi:10.1039/c9fo02440a), 2020-01-01
Supplement: c9fo02440a1.pdf [file c9fo02440a1.pdf]

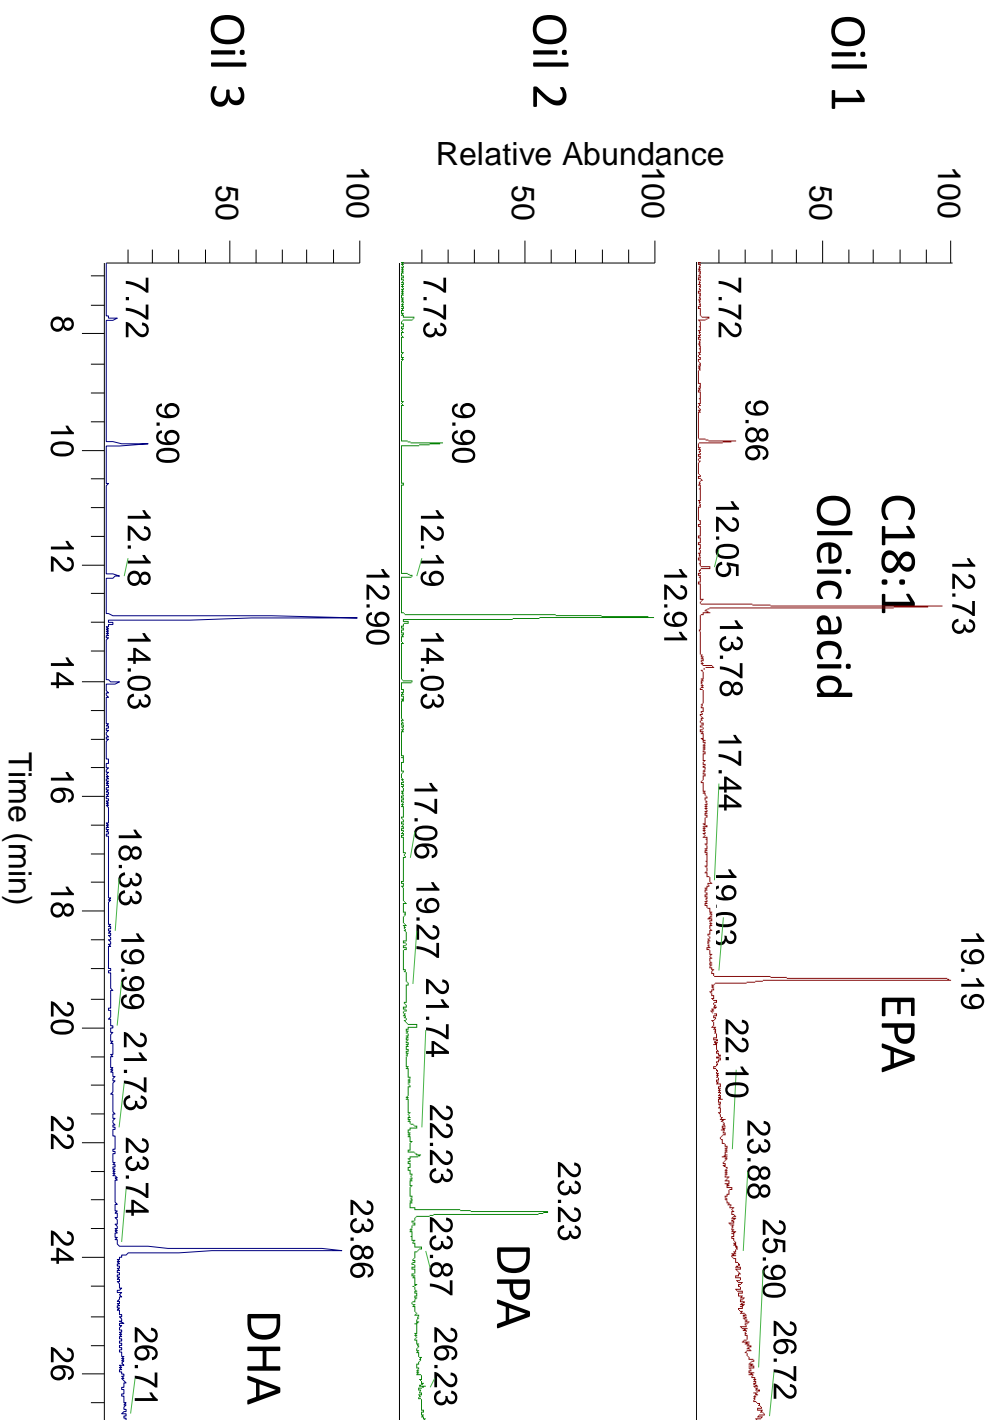

Standard  
3-methyl-5-pentyl-3-furannoic acid (methyl ester)

100  $\mu$ M

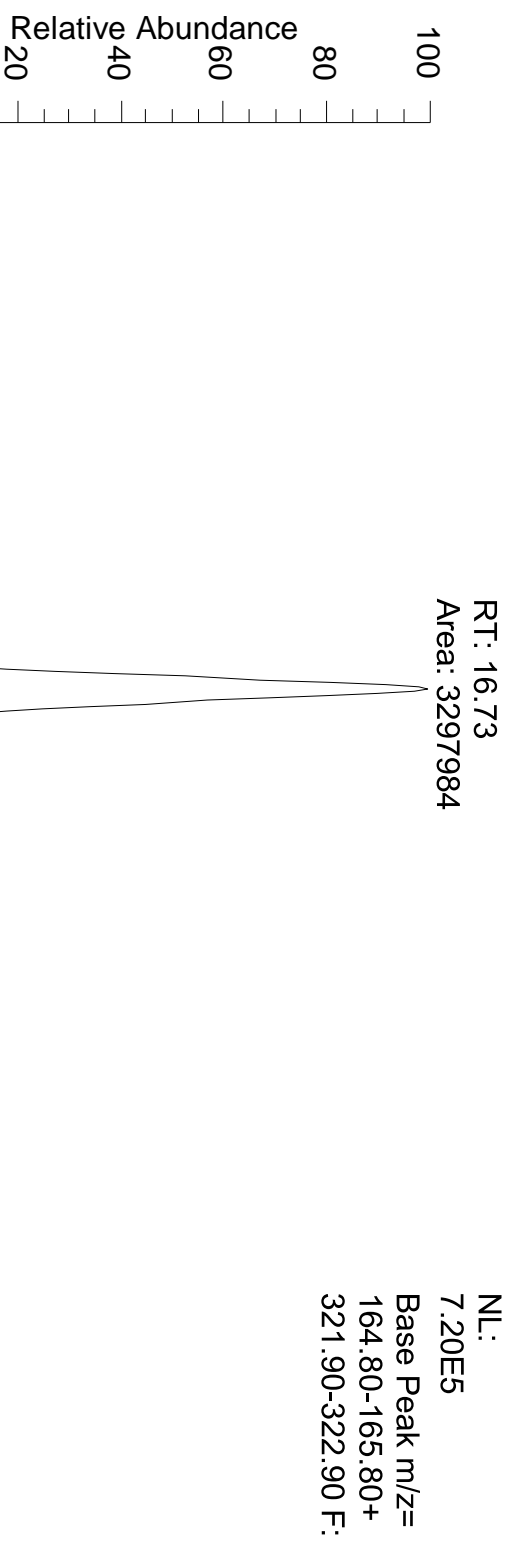

0.1  $\mu$ M

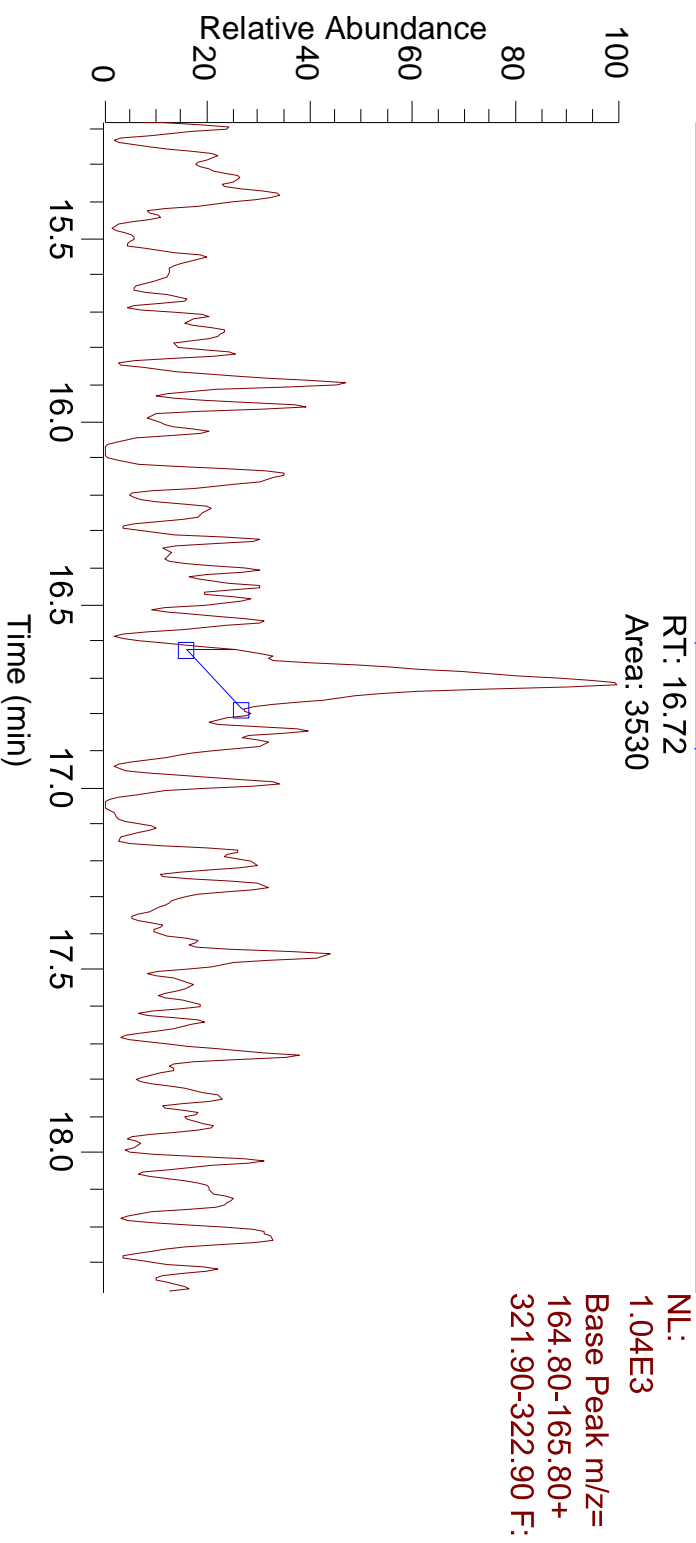

test\_100 #2264 RT: 16.73 AV: 1 NL: 7.56E5  
T: + c Full ms [45.00-400.00]

### Mass spectrum of Furan fatty acid 3-methyl-5-pentyl-3-furannoic acid (methyl ester)

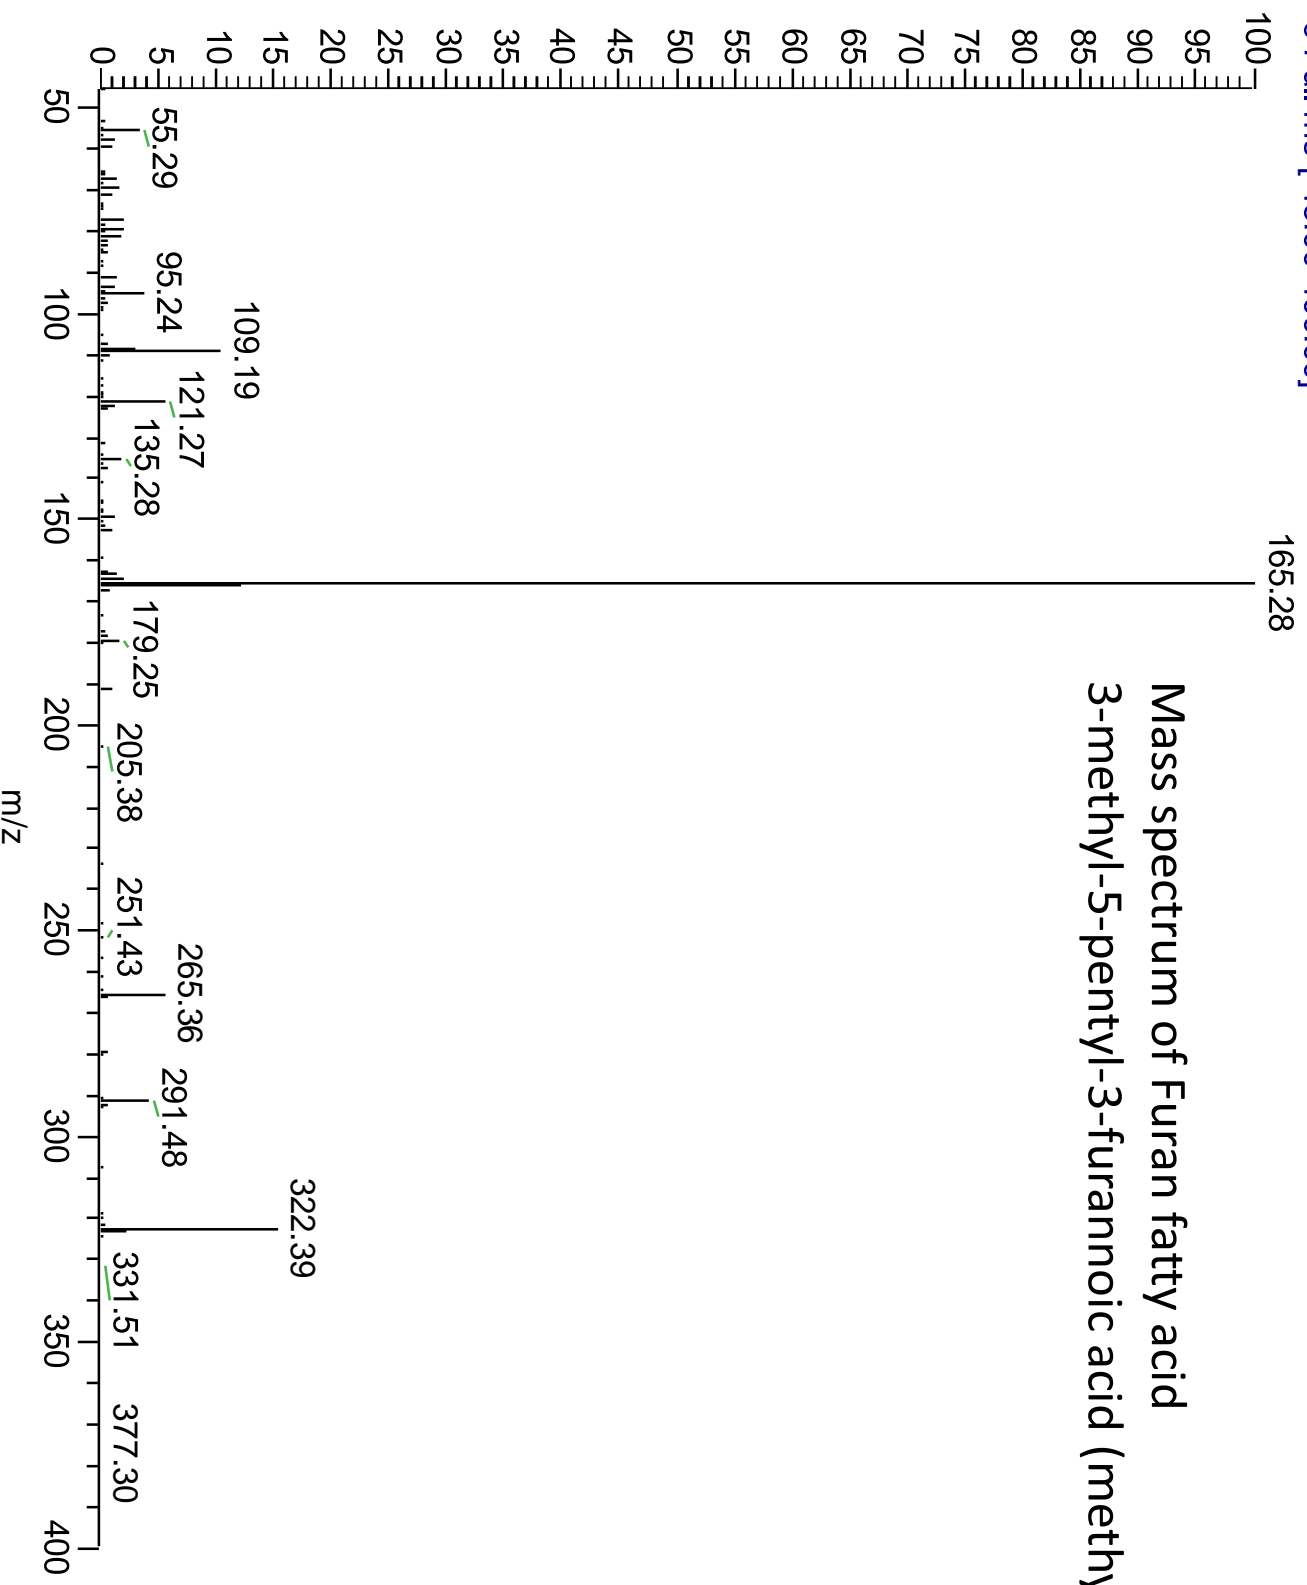

### **Supplementary Figure S1. Legend**

- A. Relative abundance of fatty acid methyl esters in the omega 3 fatty acid-olive oil supplements fed to subjects (EPA-olive oil; DPA-olive oil; DHA-olive oil).
- B. Detection levels of standard furan fatty acid - 3-methyl-5-pentyl-3-furannoic acid (methyl ester).
- C. Mass spectrum of furan fatty acid - 3-methyl-5-pentyl-3-furannoic acid (methyl ester)
